# Supplementary material for: Frailty Severity and Hospitalization After Dialysis Initiation
Source: PubMed Central journal article supplement (PMC8202313; doi:10.1177/20543581211023330), 2021-06-10
Supplement: sj-pdf-1-cjk-10.1177_20543581211023330.pdf [file sj-pdf-1-cjk-10.1177_20543581211023330.pdf]

**Supplementary Table S1. Characteristics of patients with and without assigned CFS scores.**

| <b>Variable</b>                                                                                                                                                                                                             | <b>CFS Score Available (N=564)</b> | <b>CFS Score Not Available (N=83)</b> | <b>P Value</b> |
|-----------------------------------------------------------------------------------------------------------------------------------------------------------------------------------------------------------------------------|------------------------------------|---------------------------------------|----------------|
| Age (years ± SD)                                                                                                                                                                                                            | 62 ± 15                            | 60 ± 14                               | 0.19           |
| Male, n (%)                                                                                                                                                                                                                 | 362 (64)                           | 47 (57)                               | 0.18           |
| Caucasian, n (%)                                                                                                                                                                                                            | 506 (90)                           | 70 (90)                               | 0.78           |
| BMI (kg/m <sup>2</sup> ± SD)                                                                                                                                                                                                | 30 ± 7                             | 28 ± 7                                | 0.17           |
| <b>Access/Modality</b>                                                                                                                                                                                                      |                                    |                                       | 0.02           |
| CVC, n (%)                                                                                                                                                                                                                  | 307 (54)                           | 40 (48)                               |                |
| AVF, n (%)                                                                                                                                                                                                                  | 141 (25)                           | 15 (18)                               |                |
| PD, n (%)                                                                                                                                                                                                                   | 116 (21)                           | 28 (34)                               |                |
| <b>Cause of End Stage Kidney Disease, n (%)</b>                                                                                                                                                                             |                                    |                                       | 0.04           |
| Diabetes                                                                                                                                                                                                                    | 201 (36)                           | 25 (30)                               |                |
| Glomerulonephritis                                                                                                                                                                                                          | 79 (14)                            | 8 (10)                                |                |
| Ischemic                                                                                                                                                                                                                    | 85 (15)                            | 12 (14)                               |                |
| Other                                                                                                                                                                                                                       | 117 (21)                           | 14 (17)                               |                |
| Polycystic kidney disease                                                                                                                                                                                                   | 36 (6)                             | 9 (11)                                |                |
| Unknown                                                                                                                                                                                                                     | 46 (8)                             | 15 (18)                               |                |
| Failed Transplant, n (%)                                                                                                                                                                                                    | 26 (5)                             | 15 (18)                               | <0.001         |
| <b>Comorbid Conditions, n (%)</b>                                                                                                                                                                                           |                                    |                                       |                |
| Diabetes                                                                                                                                                                                                                    | 276 (49)                           | 35 (42)                               | 0.25           |
| Coronary artery disease                                                                                                                                                                                                     | 178 (32)                           | 19 (23)                               | 0.11           |
| Congestive heart failure                                                                                                                                                                                                    | 130 (23)                           | 13 (16)                               | 0.13           |
| Peripheral vascular disease                                                                                                                                                                                                 | 89 (16)                            | 13 (16)                               | 0.98           |
| Pulmonary disease                                                                                                                                                                                                           | 98 (17)                            | 20 (24)                               | 0.14           |
| History of stroke                                                                                                                                                                                                           | 9 (2)                              | 2 (2)                                 | 0.59           |
| Cancer                                                                                                                                                                                                                      | 55 (10)                            | 15 (18)                               | 0.02           |
| Liver Disease                                                                                                                                                                                                               | 1 (1)                              | 19 (3)                                | 0.29           |
| Dementia                                                                                                                                                                                                                    | 11 (2)                             | 2 (2)                                 | 0.78           |
| <b>Laboratory</b>                                                                                                                                                                                                           |                                    |                                       |                |
| MDRD GFR (mL/min/1.73m <sup>2</sup> ±SD)                                                                                                                                                                                    | 9 ± 4                              | 9 ± 4                                 | 0.29           |
| Albumin (g/L ± SD)                                                                                                                                                                                                          | 31 ± 6                             | 31 ± 6                                | 0.87           |
| Hemoglobin (g/L ± SD)                                                                                                                                                                                                       | 94 ± 17                            | 98 ± 16                               | 0.06           |
| Phosphate (mmol/L ± SD)                                                                                                                                                                                                     | 2.0 ± 1                            | 2.1 ± 1                               | 0.46           |
| Initial dialysis as inpatient, n (%)                                                                                                                                                                                        | 211 (37)                           | 38 (46)                               | 0.14           |
| BMI, Body mass index<br>CVC, Central venous catheter<br>AVF, Arterio-venous fistula<br>PD, Peritoneal dialysis<br>MDRD GFR, Modification of diet in renal disease glomerular filtration rate<br>CFS, Clinical Frailty Scale |                                    |                                       |                |

**Supplementary Table S2. Crude outcomes of patients stratified by CFS score category.**

| <b>Variable</b>                                         | <b>CFS Score<br/>&lt; 4<br/>(N=251)</b> | <b>CFS Score<br/>4 or 5<br/>(N=235)</b> | <b>CFS Score<br/>6 or 7<br/>(N=78)</b> |
|---------------------------------------------------------|-----------------------------------------|-----------------------------------------|----------------------------------------|
| <b>Pattern of hospital admission, n (%)</b>             |                                         |                                         |                                        |
| Never admitted                                          | 42 (17)                                 | 20 (9)                                  | 7 (9)                                  |
| Initial dialysis as inpatient, no subsequent admissions | 15 (6)                                  | 21 (9)                                  | 13 (17)                                |
| Initial dialysis as outpatient, subsequent admissions   | 144 (57)                                | 122 (52)                                | 18 (23)                                |
| Initial dialysis as inpatient, subsequent admissions    | 50 (20)                                 | 72 (31)                                 | 40 (51)                                |
| Number of Admissions, median (QR)                       | 1 (2)                                   | 2 (3)                                   | 2 (3)                                  |
| <b>Days in Hospital/Cumulative Time</b>                 |                                         |                                         |                                        |
| Number of days admitted [median days, (QR)]             | 6 (26)                                  | 15 (43)                                 | 28 (64)                                |
| Cumulative time admitted to hospital [median % (QR)]    | 1 (3)                                   | 2 (6)                                   | 4 (14)                                 |
| Transplanted, n (%)                                     | 83 (33)                                 | 17 (7)                                  | 0 (0)                                  |
| Death, n (%)                                            | 60 (24)                                 | 106 (46)                                | 46 (59)                                |
| CFS, Clinical Frailty Scale                             |                                         |                                         |                                        |

**Supplemental Table S3. Predictors of cumulative time admitted to hospital. CFS score summarized as continuous scale.**

| <b>Covariate</b>                                                                                                                                                                                                                                                                                                                                                                            | <b>IRR</b> | <b>95% CI</b> |
|---------------------------------------------------------------------------------------------------------------------------------------------------------------------------------------------------------------------------------------------------------------------------------------------------------------------------------------------------------------------------------------------|------------|---------------|
| Age (years)                                                                                                                                                                                                                                                                                                                                                                                 | 1.05       | 1.03 to 1.08  |
| Sex (female vs male)                                                                                                                                                                                                                                                                                                                                                                        | 1.02       | 0.76 to 1.39  |
| Race (other vs Caucasian)                                                                                                                                                                                                                                                                                                                                                                   | 0.67       | 0.42 to 1.10  |
| BMI (per each unit increase)                                                                                                                                                                                                                                                                                                                                                                | 1.01       | 0.99 to 1.03  |
| CFS (per each unit increase)                                                                                                                                                                                                                                                                                                                                                                | 1.23       | 1.09 to 1.39  |
| Early Nephrology Referral (90+ days vs < 90 days)                                                                                                                                                                                                                                                                                                                                           | 1.25       | 0.85 to 1.87  |
| <b>Access/Modality<sup>a</sup></b>                                                                                                                                                                                                                                                                                                                                                          |            |               |
| CVC                                                                                                                                                                                                                                                                                                                                                                                         | 0.99       | 0.69 to 1.41  |
| PD                                                                                                                                                                                                                                                                                                                                                                                          | 1.28       | 0.84 to 1.95  |
| <b>End Stage Kidney Disease Cause<sup>b</sup></b>                                                                                                                                                                                                                                                                                                                                           |            |               |
| Glomerulonephritis                                                                                                                                                                                                                                                                                                                                                                          | 0.83       | 0.51 to 1.38  |
| Polycystic kidney disease                                                                                                                                                                                                                                                                                                                                                                   | 1.91       | 0.99 to 3.89  |
| Ischemic renal disease                                                                                                                                                                                                                                                                                                                                                                      | 0.68       | 0.44 to 1.08  |
| Other                                                                                                                                                                                                                                                                                                                                                                                       | 1.20       | 0.77 to 1.89  |
| Unknown                                                                                                                                                                                                                                                                                                                                                                                     | 0.75       | 0.43 to 1.36  |
| <b>Comorbid conditions<sup>c</sup></b>                                                                                                                                                                                                                                                                                                                                                      |            |               |
| Coronary artery disease                                                                                                                                                                                                                                                                                                                                                                     | 0.91       | 0.65 to 1.28  |
| Congestive heart failure                                                                                                                                                                                                                                                                                                                                                                    | 1.23       | 0.84 to 1.82  |
| Peripheral vascular disease                                                                                                                                                                                                                                                                                                                                                                 | 1.08       | 0.73 to 1.64  |
| Pulmonary disease                                                                                                                                                                                                                                                                                                                                                                           | 1.21       | 0.82 to 1.81  |
| History of stroke                                                                                                                                                                                                                                                                                                                                                                           | 1.45       | 0.95 to 2.31  |
| Cancer                                                                                                                                                                                                                                                                                                                                                                                      | 1.55       | 0.95 to 2.62  |
| Liver disease                                                                                                                                                                                                                                                                                                                                                                               | 1.99       | 1.04 to 4.09  |
| <b>Laboratory</b>                                                                                                                                                                                                                                                                                                                                                                           |            |               |
| MDRD GFR (mL/min/1.73m <sup>2</sup> )                                                                                                                                                                                                                                                                                                                                                       | 0.98       | 0.94 to 1.02  |
| Albumin (g/L)                                                                                                                                                                                                                                                                                                                                                                               | 0.94       | 0.92 to 0.96  |
| Phosphate (mmol/L)                                                                                                                                                                                                                                                                                                                                                                          | 1.41       | 1.10 to 1.82  |
| Hemoglobin (g/L)                                                                                                                                                                                                                                                                                                                                                                            | 0.99       | 0.98 to 1.00  |
| <sup>a</sup> Arterio-venous fistula = reference group<br><sup>b</sup> Diabetic nephropathy = reference group<br><sup>c</sup> yes/no<br>CVC, Central venous catheter<br>PD, Peritoneal dialysis<br>MDRD GFR, Modification of diet in renal disease glomerular filtration rate<br>BMI, Body mass index<br>CFS, Clinical Frailty Scale<br>IRR, Incidence rate ratio<br>CI, Confidence interval |            |               |

**Supplemental Table S4. Predictors of cumulative time admitted to hospital in the first year after dialysis initiation. CFS score summarized by category.**

| <b>Covariate</b>                                                                                                                                                                                                                                                                                                                                                                            | <b>IRR</b> | <b>95% CI</b> |
|---------------------------------------------------------------------------------------------------------------------------------------------------------------------------------------------------------------------------------------------------------------------------------------------------------------------------------------------------------------------------------------------|------------|---------------|
| Age (years)                                                                                                                                                                                                                                                                                                                                                                                 | 1.00       | 0.99 to 1.02  |
| Sex (female vs male)                                                                                                                                                                                                                                                                                                                                                                        | 1.24       | 0.90 to 1.70  |
| Race (other vs Caucasian)                                                                                                                                                                                                                                                                                                                                                                   | 0.70       | 0.40 to 1.20  |
| BMI (per each unit increase)                                                                                                                                                                                                                                                                                                                                                                | 1.01       | 0.98 to 1.03  |
| CFS 4 or 5 (vs CFS < 4)                                                                                                                                                                                                                                                                                                                                                                     | 2.40       | 1.59 to 3.61  |
| CFS 6 or 7 (vs CFS < 4)                                                                                                                                                                                                                                                                                                                                                                     | 4.07       | 2.60 to 6.36  |
| Early Nephrology Referral (90+ days vs < 90 days)                                                                                                                                                                                                                                                                                                                                           | 1.33       | 0.95 to 1.87  |
| <b>Access/Modality<sup>a</sup></b>                                                                                                                                                                                                                                                                                                                                                          |            |               |
| CVC                                                                                                                                                                                                                                                                                                                                                                                         | 0.68       | 0.47 to 1.00  |
| PD                                                                                                                                                                                                                                                                                                                                                                                          | 0.57       | 0.31 to 1.04  |
| <b>End Stage Kidney Disease Cause<sup>b</sup></b>                                                                                                                                                                                                                                                                                                                                           |            |               |
| Glomerulonephritis                                                                                                                                                                                                                                                                                                                                                                          | 1.36       | 0.82 to 2.27  |
| Polycystic kidney disease                                                                                                                                                                                                                                                                                                                                                                   | 0.66       | 0.19 to 2.24  |
| Ischemic renal disease                                                                                                                                                                                                                                                                                                                                                                      | 0.72       | 0.46 to 1.16  |
| Other                                                                                                                                                                                                                                                                                                                                                                                       | 1.30       | 0.83 to 2.06  |
| Unknown                                                                                                                                                                                                                                                                                                                                                                                     | 1.33       | 0.74 to 2.41  |
| <b>Comorbid conditions<sup>c</sup></b>                                                                                                                                                                                                                                                                                                                                                      |            |               |
| Coronary artery disease                                                                                                                                                                                                                                                                                                                                                                     | 1.45       | 1.02 to 2.00  |
| Congestive heart failure                                                                                                                                                                                                                                                                                                                                                                    | 0.92       | 0.64 to 1.30  |
| Peripheral vascular disease                                                                                                                                                                                                                                                                                                                                                                 | 0.89       | 0.59 to 1.34  |
| Pulmonary disease                                                                                                                                                                                                                                                                                                                                                                           | 1.07       | 0.71 to 1.59  |
| History of stroke                                                                                                                                                                                                                                                                                                                                                                           | 1.37       | 0.86 to 2.22  |
| Cancer                                                                                                                                                                                                                                                                                                                                                                                      | 0.98       | 0.60 to 1.61  |
| Liver disease                                                                                                                                                                                                                                                                                                                                                                               | 1.71       | 0.89 to 3.27  |
| <b>Laboratory</b>                                                                                                                                                                                                                                                                                                                                                                           |            |               |
| MDRD GFR (mL/min/1.73m <sup>2</sup> )                                                                                                                                                                                                                                                                                                                                                       | 0.98       | 0.93 to 1.02  |
| Albumin (g/L)                                                                                                                                                                                                                                                                                                                                                                               | 0.97       | 0.94 to 0.99  |
| Phosphate (mmol/L)                                                                                                                                                                                                                                                                                                                                                                          | 1.06       | 0.85 to 1.30  |
| Hemoglobin (g/L)                                                                                                                                                                                                                                                                                                                                                                            | 1.00       | 0.99 to 1.01  |
| <sup>a</sup> Arterio-venous fistula = reference group<br><sup>b</sup> Diabetic nephropathy = reference group<br><sup>c</sup> yes/no<br>CVC, Central venous catheter<br>PD, Peritoneal dialysis<br>MDRD GFR, Modification of diet in renal disease glomerular filtration rate<br>BMI, Body mass index<br>CFS, Clinical Frailty Scale<br>IRR, Incidence rate ratio<br>CI, Confidence interval |            |               |

**Supplemental Table S5. Predictors of cumulative time admitted to hospital excluding time in hospital for those that initiated dialysis as an inpatient. CFS score summarized as continuous scale.**

| <b>Covariate</b>                                                                                                                                                                                                                                                                                                                                                                            | <b>IRR</b> | <b>95% CI</b> |
|---------------------------------------------------------------------------------------------------------------------------------------------------------------------------------------------------------------------------------------------------------------------------------------------------------------------------------------------------------------------------------------------|------------|---------------|
| Age (years)                                                                                                                                                                                                                                                                                                                                                                                 | 1.07       | 1.04 to 1.11  |
| Sex (female vs male)                                                                                                                                                                                                                                                                                                                                                                        | 1.01       | 0.71 to 1.44  |
| Race (other vs Caucasian)                                                                                                                                                                                                                                                                                                                                                                   | 0.88       | 0.49 to 1.58  |
| BMI (per each unit increase)                                                                                                                                                                                                                                                                                                                                                                | 1.00       | 0.97 to 1.03  |
| CFS (per each unit increase)                                                                                                                                                                                                                                                                                                                                                                | 1.12       | 0.97 to 1.30  |
| Early Nephrology Referral (90+ days vs < 90 days)                                                                                                                                                                                                                                                                                                                                           | 0.93       | 0.59 to 1.48  |
| <b>Access/Modality<sup>a</sup></b>                                                                                                                                                                                                                                                                                                                                                          |            |               |
| CVC                                                                                                                                                                                                                                                                                                                                                                                         | 1.08       | 0.72 to 1.63  |
| PD                                                                                                                                                                                                                                                                                                                                                                                          | 1.31       | 0.81 to 2.13  |
| <b>End Stage Kidney Disease Cause<sup>b</sup></b>                                                                                                                                                                                                                                                                                                                                           |            |               |
| Glomerulonephritis                                                                                                                                                                                                                                                                                                                                                                          | 0.62       | 0.35 to 1.10  |
| Polycystic kidney disease                                                                                                                                                                                                                                                                                                                                                                   | 2.07       | 0.93 to 4.61  |
| Ischemic renal disease                                                                                                                                                                                                                                                                                                                                                                      | 0.63       | 0.37 to 1.08  |
| Other                                                                                                                                                                                                                                                                                                                                                                                       | 1.03       | 0.61 to 1.72  |
| Unknown                                                                                                                                                                                                                                                                                                                                                                                     | 0.39       | 0.20 to 0.76  |
| <b>Comorbid conditions<sup>c</sup></b>                                                                                                                                                                                                                                                                                                                                                      |            |               |
| Coronary artery disease                                                                                                                                                                                                                                                                                                                                                                     | 0.81       | 0.55 to 1.18  |
| Congestive heart failure                                                                                                                                                                                                                                                                                                                                                                    | 1.47       | 0.93 to 2.30  |
| Peripheral vascular disease                                                                                                                                                                                                                                                                                                                                                                 | 1.21       | 0.75 to 1.93  |
| Pulmonary disease                                                                                                                                                                                                                                                                                                                                                                           | 1.18       | 0.75 to 1.85  |
| History of stroke                                                                                                                                                                                                                                                                                                                                                                           | 1.44       | 0.87 to 2.39  |
| Cancer                                                                                                                                                                                                                                                                                                                                                                                      | 1.57       | 0.87 to 2.82  |
| Liver disease                                                                                                                                                                                                                                                                                                                                                                               | 1.07       | 0.50 to 2.28  |
| <b>Laboratory</b>                                                                                                                                                                                                                                                                                                                                                                           |            |               |
| MDRD GFR (mL/min/1.73m <sup>2</sup> )                                                                                                                                                                                                                                                                                                                                                       | 0.98       | 0.94 to 1.02  |
| Albumin (g/L)                                                                                                                                                                                                                                                                                                                                                                               | 0.95       | 0.92 to 0.98  |
| Phosphate (mmol/L)                                                                                                                                                                                                                                                                                                                                                                          | 1.11       | 0.83 to 1.48  |
| Hemoglobin (g/L)                                                                                                                                                                                                                                                                                                                                                                            | 0.99       | 0.98 to 1.00  |
| <sup>a</sup> Arterio-venous fistula = reference group<br><sup>b</sup> Diabetic nephropathy = reference group<br><sup>c</sup> yes/no<br>CVC, Central venous catheter<br>PD, Peritoneal dialysis<br>MDRD GFR, Modification of diet in renal disease glomerular filtration rate<br>BMI, Body mass index<br>CFS, Clinical Frailty Scale<br>IRR, Incidence rate ratio<br>CI, Confidence interval |            |               |

**Supplemental Table S6. Joint risk of hospitalization and all-cause mortality in the first year after dialysis initiation<sup>a</sup>. CFS score summarized by category. N=561.**

| CFS Category <sup>b</sup> | Recurrent Hospitalization |                | Death        |                |
|---------------------------|---------------------------|----------------|--------------|----------------|
|                           | Hazard Ratio              | 95% CI         | Hazard Ratio | 95% CI         |
| CFS 4 or 5                | 1.81                      | (1.43 to 2.30) | 2.78         | (1.48 to 5.24) |
| CFS 6 or 7                | 1.81                      | (1.30 to 2.52) | 3.42         | (1.57 to 7.44) |

<sup>a</sup>Adjusted for cause of end stage kidney disease; age; sex; race; early nephrology referral; comorbidities: cancer, coronary artery disease, congestive heart failure, cerebrovascular disease, pulmonary disease, liver disease, diabetes; laboratory: albumin.

<sup>b</sup>(CFS < 4 = reference)

CI, Confidence interval

**Supplemental Table S7. Joint risk of hospitalization and all-cause mortality in the first year after dialysis initiation<sup>a</sup>. CFS score summarized by a continuous scale. N=561.**

| CFS Category                 | Recurrent Hospitalization |                | Death        |                |
|------------------------------|---------------------------|----------------|--------------|----------------|
|                              | Hazard Ratio              | 95% CI         | Hazard Ratio | 95% CI         |
| CFS (per each unit increase) | 1.16                      | (1.07 to 1.25) | 1.23         | (1.08 to 1.40) |

<sup>a</sup>Adjusted for cause of end stage kidney disease; age; sex; race; early nephrology referral; comorbidities: cancer, coronary artery disease, congestive heart failure, cerebrovascular disease, pulmonary disease, liver disease, diabetes; laboratory: albumin.  
CI, Confidence interval
